# Supplementary material for: Shedding light on moiré excitons: A first-principles perspective
Source: PubMed Central journal article supplement — Sci Adv. 2020 Oct 16;6(42):eabc5638. doi: 10.1126/sciadv.abc5638 (PMC7567599; doi:10.1126/sciadv.abc5638), 2020-10-16
Supplement: abc5638_SM.pdf [file abc5638_SM.pdf]

## Supplementary Materials for

### **Shedding light on moiré excitons: A first-principles perspective**

Hongli Guo, Xu Zhang, Gang Lu\*

\*Corresponding author. Email: [gang.lu@csun.edu](mailto:gang.lu@csun.edu)

Published 16 October 2020, *Sci. Adv.* **6**, eabc5638 (2020)

DOI: [10.1126/sciadv.abc5638](https://doi.org/10.1126/sciadv.abc5638)

#### **This PDF file includes:**

Table S1

Figs. S1 to S5

Table S1. **Twist angle dependent band width and exciton binding energy.** The variation of interlayer distance ( $\delta h$ ), VBM bandwidth, and exciton binding energy as a function of twist angle.

|                             |      |      |      |      |      |      |      |
|-----------------------------|------|------|------|------|------|------|------|
| Angle ( $^{\circ}$ )        | 3.5  | 6    | 9.56 | 21.7 | 32.2 | 0    | 56.5 |
| $\delta h$ ( $\text{\AA}$ ) | 0.54 | 0.44 | 0.22 | 0.02 | 0.02 | 0.00 | 0.58 |
| VBM bandwidth (meV)         | 7    | 25   | 111  | 617  | 345  | 1500 | 3    |
| Exciton binding energy (eV) | 0.43 | 0.42 | N/A  | 0.43 | 0.39 | 0.50 | 0.42 |

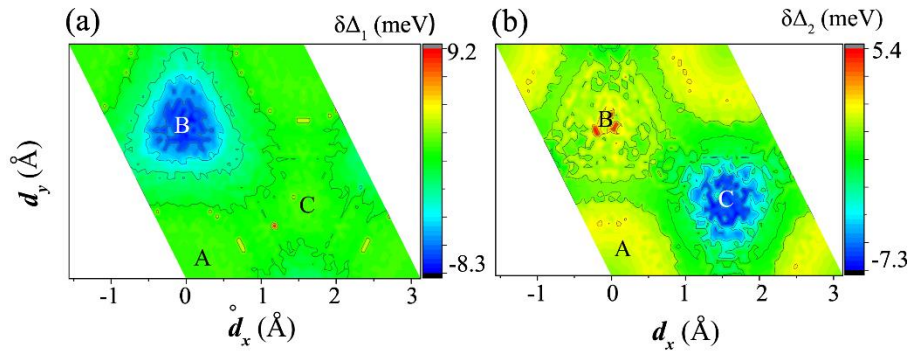

Figure S1. **Moiré modulated local intralayer gaps.** Variation of intralayer band gaps  $\Delta_1$  (a) and  $\Delta_2$  (b) as a function of  $d$ .

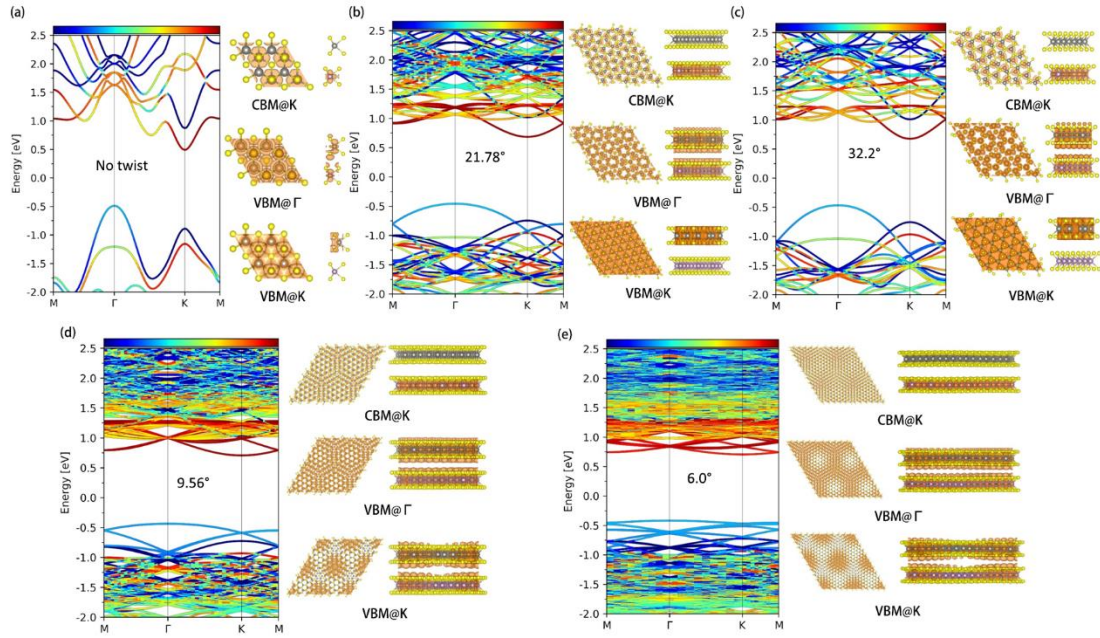

Figure S2. **Twist angle dependent electronic structures.** Band structures and charge densities of VBM and CBM for MoS<sub>2</sub>/WS<sub>2</sub> heterostructures with different twist angles.

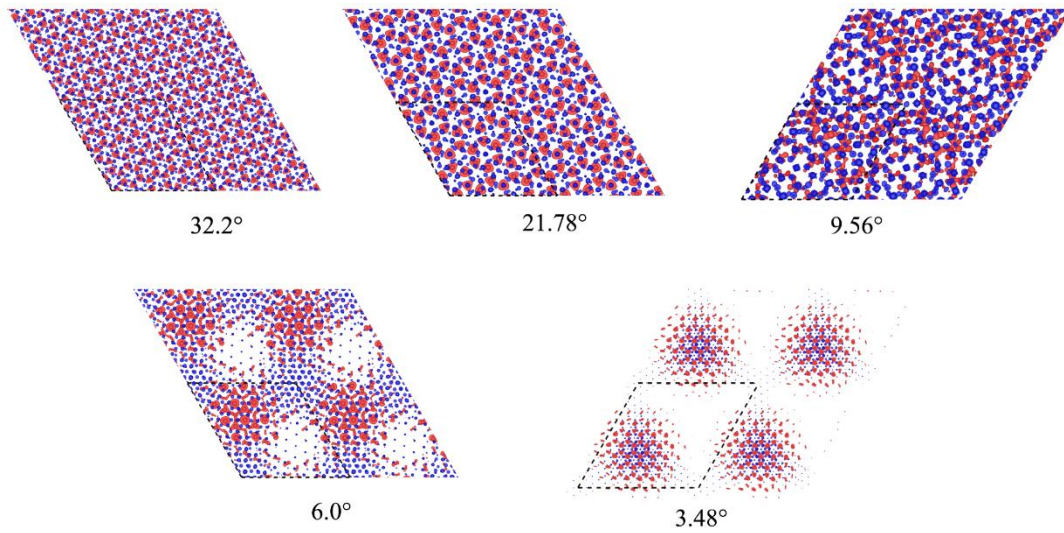

Figure S3. **Exciton charge densities of MoS<sub>2</sub>/WS<sub>2</sub> heterostructures with different twist angles.**

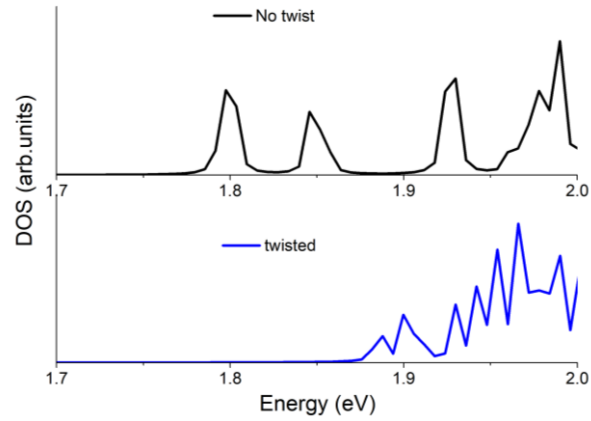

Figure S4. **Exciton energy splitting by moiré potential.** Excitonic density of states (DOS) for MoS<sub>2</sub>/WS<sub>2</sub> heterostructures with  $\theta=0^\circ$  (no twist) and  $\theta=3.48^\circ$ . The DOS of twisted heterostructure shows denser energy spacing.

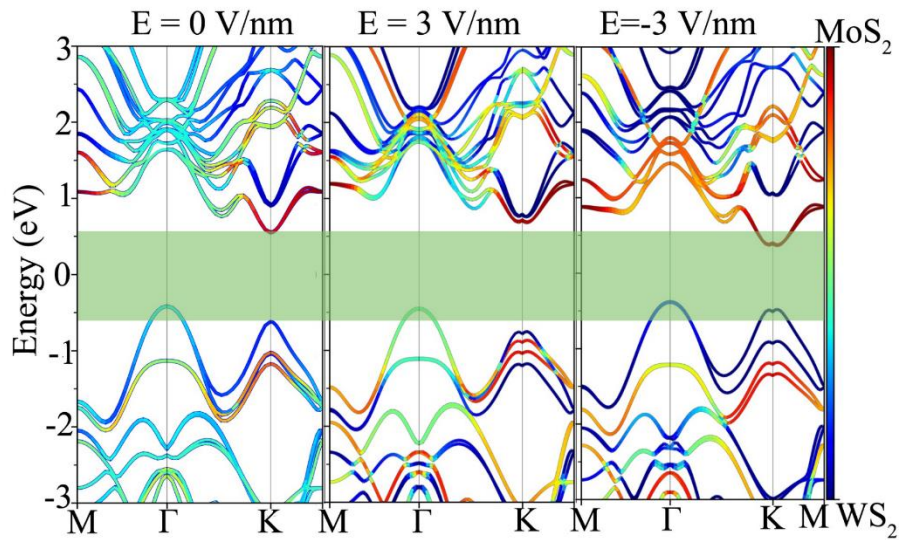

Figure S5. **Band structure of MoS<sub>2</sub>/WS<sub>2</sub> heterostructure ( $\theta=0^\circ$ ) under electric field.** PBE+SOC band structures of MoS<sub>2</sub>/WS<sub>2</sub> heterostructure ( $\theta=0^\circ$ ) under different electric fields, showing the energy level shifts that are consistent with Figure 6(a).
